# Supplementary material for: Periodontal and Peri-Implant Microbiome Dysbiosis Is Associated With Alterations in the Microbial Community Structure and Local Stability
Source: Frontiers journal article supplement (doi:10.3389/fmicb.2021.785191), 2022-01-25
Supplement: Presentation_1.pdf [file Presentation_1.pdf]

## **Supplementary Information**

### **Examiner calibration**

Before the study, intra-examiner calibration had been performed by measuring the PD and radiographic bone loss of 20 teeth and 10 implants not included in the study three times within a day. Each measurement had a minimum intermission of 1 hour. The results were taken as consistent when the error among three measurements was no more than 1mm. The percentage of consistency should be no less than 90% to pass the intra-examiner calibration. The total percentage of consistency on this examiner turned out to be 93.33%.

### **Sampling sites selection**

Selection of sampling sites followed these criteria: 1) For periodontal health subjects, four first molars were selected for sampling; 2) For subjects with periodontitis, the plaque was sampled from the teeth with deepest probing depth per quadrant; 3) For subjects with implants, samples were taken from the specific implants which met our inclusion criteria in Table 1. Detailed information of all samples can be seen in Supplementary Tables 1 and 2.

### **PERMANOVA and core microbiome computation**

As illustrated in the main text, after annotations at species level, we performed PERMANOVA to evaluate the impact of different factors on the compositions of the microbiome (Supplementary Figure 1A). The results indicated that supragingival and subgingival microbiome were significantly different. This was confirmed by PCoA on the beta diversity of supra- and subgingival microbiome (Supplementary Figure 1B). Then we compared the alpha diversity using Chao1 and Shannon indices (Supplementary Figure 1C). The result showed that supragingival microbiome had significantly higher Chao1 index yet similar Shannon index when compared with subgingival microbiome. This indicated that the supragingival communities had higher species richness, however, some of the species were either too high or too little in abundance which resulted in poorer evenness in comparison. We then computed the core microbiome in supra- and subgingival communities (Supplementary Figure 1D). Core species represented those bacteria members shared by at least 80% of individuals in either supra- or subgingival microbiome with a minimum relative abundance of 0.1%. Detailed lists of core species were presented in Supplementary Table 4.

We also compared the relative abundance of these core species between healthy and diseased

individuals (Supplementary Figure 2). There were no significant differences in relative abundance in any of the core species, indicating that the core components of supragingival (or subgingival) communities were in a way constant and did not change with the shift of health conditions. We therefore took a further look into the community structure to figure out what factors differentiate the healthy and diseased microbiome as shown in the main text.

## Stability analysis

Here we briefly review local asymptotic stability (henceforth, stability) and show how to analyze the stability of the oral microbiome through experimental data and numerical simulation.

### 1. Dynamical framework

Following May's assumptions, we consider the microbial community- which consists of  $S$  interacting species- as an autonomous system. The dynamical behavior of this system can be described by a set of ordinary differential equations:

$$\frac{dX_i}{dt} = f_i(\mathbf{X}(t))$$

where  $X_i(t)$  represents, for example, the abundance of population  $i$  at time  $t$ , and  $f_i$  is the function expressing the growth rate of population  $i$ , which depends on the abundance of all populations. The point  $\mathbf{X}^* > 0$  is a feasible equilibrium if  $f_i(\mathbf{X}^*) = 0$  for all  $i$ .

Around the equilibrium, the trajectories can be described by considering a linearized system. Suppose the system is resting at the equilibrium  $\mathbf{X}^*$ , and that a sufficiently small perturbation is applied at time zero,  $\mathbf{X}(0) = \mathbf{X}^* - \mathbf{x}(0)$ . Then, by Taylor expansion:

$$\frac{d\mathbf{x}(t)}{dt} \approx \mathbf{J}(\mathbf{X}^*)\mathbf{x}(t)$$

where  $\mathbf{J}$  is the Jacobian matrix of the system,  $J_{ij} = \frac{\partial f_i}{\partial X_j}$ . The so-called “community matrix  $\mathbf{M}$ ” is the Jacobian evaluated at  $\mathbf{X}^*$ , and therefore:

$$\frac{d\mathbf{x}(t)}{dt} \approx \mathbf{M}\mathbf{x}(t)$$

which is a system of homogeneous linear differential equations with constant coefficients. This system has solution:

$$\mathbf{x}(t) = e^{\mathbf{M}t} \mathbf{x}(0)$$

Moreover, if  $\mathbf{M}$  is diagonalizable, it can be decomposed as  $\mathbf{P}^{-1}\mathbf{\Lambda}\mathbf{P}$  where  $\mathbf{\Lambda}$  is a diagonal matrix whose diagonal coefficients are the eigenvalues of  $\mathbf{M}$ , and  $\mathbf{P}$  is a matrix whose columns are the corresponding right eigenvectors. In this case, the solution becomes:

$$\mathbf{x}(t) = \mathbf{P}^{-1}e^{\mathbf{\Lambda}t}\mathbf{P}\mathbf{x}(0)$$

If all the eigenvalues of  $\mathbf{M}$  have negative real part, the small perturbation  $\mathbf{x}(t)$  will eventually decay to zero. Thus, if we order the eigenvalues according to their real part,  $R_e(\lambda_{\mathbf{M},1}) > \dots > R_e(\lambda_{\mathbf{M},S})$ , stability is exclusively determined by  $R_e(\lambda_{\mathbf{M},1})$ . If  $R_e(\lambda_{\mathbf{M},1}) < 0$ , the equilibrium is stable, and if  $R_e(\lambda_{\mathbf{M},1}) > 0$ , the equilibrium is unstable.

In fact,  $R_e(\lambda_{\mathbf{M},1})$  describes the asymptotic decay rate of the system after perturbation. Thus,  $R_e(\lambda_{\mathbf{M},1})$  is often used as a measure of the system's stability. Following previous work, we here define the system's stability as  $-R_e(\lambda_{\mathbf{M},1})$ .

## 2. Stability analysis using experimental data and numerical simulation

What mentioned above shows that the key to stability analysis is the construction of community matrix  $\mathbf{M}$ ,  $\mathbf{M}$  can be constructed by the following two steps. Firstly, we generated the adjacency matrix  $\mathbf{K}$  from our taxonomical data.  $K_{ij} > 0$  meant species  $i$  received a positive effect from species  $j$ ,  $K_{ij} < 0$  meant species  $i$  received a negative effect from species  $j$  while  $K_{ij} = 0$  meant species  $j$  had no effect on species  $i$ . Secondly, we assigned the coefficients of  $\mathbf{M}$  as follows:

$$\begin{cases} K_{ij} > 0 \rightarrow M_{ij} = |Z| \\ K_{ij} < 0 \rightarrow M_{ij} = -|Z| \\ K_{ii} = -d \end{cases}$$

where  $Z$  was a random variable obeying normal distribution  $N(\mu, \sigma^2)$ .

We then performed a series of numerical simulations by changing  $\mu$  and  $\sigma$ . For each parameter combination, we performed 50 simulations (Figure 5 and Supplementary Figure 3). The results showed that healthy subgingival communities possessed the worst stability while the diseased subgingival communities possessed the highest stability.

## Supplementary Tables

**Supplementary Table 1. Detailed information of samples from teeth.**

| Subject<br>Code | Sample Code   |             | Age<br>(years) | Sex    | PD<br>(mm) | RBL<br>(mm) |
|-----------------|---------------|-------------|----------------|--------|------------|-------------|
|                 | Supragingival | Subgingival |                |        |            |             |
| <b>HT-1</b>     | A2            | A3          | 32             | Male   | 2          | 0           |
| <b>HT-2</b>     | D2            | B2          | 46             | Male   | 2          | 1           |
| <b>HT-3</b>     | E2            | E3          | 52             | Female | 3          | 1           |
| <b>HT-4</b>     | H-H-up        | H-H-dw      | 38             | Male   | 2          | 0           |
| <b>HT-5</b>     | H-I-up        | H-I-dw      | 50             | Female | 3          | 0           |
| <b>HT-6</b>     | H-G-up        | H-G-dw      | 29             | Female | 1          | 0           |
| <b>HT-7</b>     | H-K-up        | H-K-dw      | 44             | Male   | 3          | 1           |
| <b>HT-8</b>     | H-O-up        | H-O-dw      | 37             | Male   | 3          | 0           |
| <b>HT-9</b>     | H-N-up        | H-N-dw      | 36             | Male   | 2          | 0           |
| <b>HT-10</b>    | /             | C2          | 40             | Female | 2          | 0           |
| <b>DT-1</b>     | CP-a-up       | CP-a-dw     | 46             | Male   | 6          | 3           |
| <b>DT-2</b>     | CP-c-up       | /           | 62             | Male   | 5          | 3           |
| <b>DT-3</b>     | CP-d-up       | CP-d-dw     | 41             | Female | 6          | 4           |
| <b>DT-4</b>     | CP-f-up       | CP-f-dw     | 50             | Male   | 5          | 3           |
| <b>DT-5</b>     | CP-g-up       | CP-g-dw     | 46             | Male   | 7          | 4           |
| <b>DT-6</b>     | CP-h-up       | CP-h-dw     | 61             | Male   | 4          | 3           |
| <b>DT-7</b>     | CP-m-up       | CP-m-dw     | 52             | Male   | 5          | 4           |
| <b>DT-8</b>     | CP-o-up       | CP-o-dw     | 36             | Female | 5          | 3           |
| <b>DT-9</b>     | CP-q-up       | CP-q-dw     | 48             | Male   | 7          | 5           |
| <b>DT-10</b>    | CP-t-up       | CP-t-dw     | 68             | Female | 6          | 4           |

HT and DT stand for healthy teeth and teeth with periodontitis, respectively. Note that the supragingival sample from subject HT-1 was discarded due to contamination during transportation. The subgingival sample from subject DT-2 failed to pass quality control after filtration and was therefore discarded.

**Supplementary Table 2. Detailed information of samples from dental implants.**

| Subject<br>Code | Sample Code   |             | Age<br>(years) | Sex    | PD<br>(mm) | RBL<br>(mm) | Functional<br>Time<br>(years) | Implant<br>Location |
|-----------------|---------------|-------------|----------------|--------|------------|-------------|-------------------------------|---------------------|
|                 | Supragingival | Subgingival |                |        |            |             |                               |                     |
| <b>HI-1</b>     | HIU-182       | HID-184     | 51             | Female | 4          | 1           | 4                             | Posterior           |
| <b>HI-2</b>     | HIU-186       | HID-188     | 51             | Female | 3          | 0           | 2                             | Posterior           |
| <b>HI-3</b>     | HIU-222       | HID-224     | 63             | Female | 4          | 0           | 4                             | Posterior           |
| <b>HI-4</b>     | HIU-232       | HID-234     | 68             | Female | 4          | 1           | 3                             | Posterior           |
| <b>HI-5</b>     | HIU-242       | HID-244     | 44             | Male   | 4          | 0           | 5                             | Posterior           |
| <b>HI-6</b>     | HIU-252       | HID-254     | 48             | Male   | 4          | 0           | 4                             | Posterior           |
| <b>HI-7</b>     | HIU-256       | HID-258     | 37             | Male   | 3          | 0           | 4                             | Posterior           |
| <b>HI-8</b>     | HIU-A2        | HID-B2      | 60             | Female | 3          | 0           | 3                             | Posterior           |
| <b>HI-9</b>     | HIU-B1        | HID-B3      | 33             | Female | 2          | 1           | 4                             | Posterior           |
| <b>DI-1</b>     | IIU-31        | IID-33      | 29             | Male   | 7          | 3           | 3                             | Posterior           |
| <b>DI-2</b>     | IIU-42        | IID-44      | 65             | Female | 8          | 5           | 4                             | Anterior            |
| <b>DI-3</b>     | IIU-82        | IID-84      | 41             | Female | 6          | 3           | 3                             | Posterior           |
| <b>DI-4</b>     | /             | IID-194     | 39             | Female | 6          | 3           | 5                             | Posterior           |
| <b>DI-5</b>     | /             | IID-264     | 56             | Male   | 7          | 4           | 9                             | Anterior            |

HI and DI stand for healthy implants and implants with peri-implantitis, respectively. Note that the supragingival samples from subjects DI-4 and DI-5 were discarded due to contamination during transportation.

**Supplementary Table 3. Summary of clinical and demographic characteristics of all samples.**

| Group Category | Mean Age (years) | Sex Distribution (Female%) | Average PD (mm) | Average RBL (mm) | Functional Time (years) | Implant Location |           | Implant System |      |     |
|----------------|------------------|----------------------------|-----------------|------------------|-------------------------|------------------|-----------|----------------|------|-----|
|                |                  |                            |                 |                  |                         | Anterior         | Posterior | Osstem         | Bego | ITI |
| Group T        | 45.70            | 35.00                      | 3.95            | 1.95             | /                       | /                | /         | /              | /    | /   |
| HT             | 40.40            | 40.00                      | 2.30            | 0.30             | /                       | /                | /         | /              | /    | /   |
| DT             | 51.00            | 30.00                      | 5.60            | 3.60             | /                       | /                | /         | /              | /    | /   |
| Group I        | 48.93            | 64.29                      | 4.64            | 1.50             | 4.07                    | 2                | 12        | 4              | 7    | 3   |
| HI             | 50.56            | 66.67                      | 3.44            | 0.33             | 3.67                    | 0                | 9         | 1              | 5    | 3   |
| DI             | 46.00            | 60.00                      | 6.80            | 3.60             | 4.80                    | 2                | 3         | 3              | 2    | 0   |

**Supplementary Table 4. List of core species in supra- and subgingival microbiome.**

| <b>Subgingival Core Microbiome</b>  | <b>Supragingival Core Microbiome</b> |
|-------------------------------------|--------------------------------------|
| Tannerella_forsythia                |                                      |
| Streptococcus_oralis                | Streptococcus_oralis                 |
| Actinomyces_oris                    | Actinomyces_oris                     |
| Streptococcus_sanguinis             | Streptococcus_sanguinis              |
| Fusobacterium_nucleatum             | Fusobacterium_nucleatum              |
| Actinomyces_sp_oral_taxon_414       | Actinomyces_sp_oral_taxon_414        |
| Veillonella_parvula                 | Veillonella_parvula                  |
| Lautropia_mirabilis                 | Lautropia_mirabilis                  |
| Actinomyces_naeslundii              | Actinomyces_naeslundii               |
| Corynebacterium_matruchotii         | Corynebacterium_matruchotii          |
| Pseudopropionibacterium_propionicum | Pseudopropionibacterium_propionicum  |
| Capnocytophaga_gingivalis           | Capnocytophaga_gingivalis            |
| Capnocytophaga_sputigena            | Capnocytophaga_sputigena             |
|                                     | Campylobacter_gracilis               |
|                                     | Capnocytophaga_leadbetteri           |
|                                     | Capnocytophaga_ochracea              |
|                                     | Neisseria_sicca                      |
|                                     | Tannerella_sp_oral_taxon_HOT_286     |
|                                     | Streptococcus_cristatus              |
|                                     | Capnocytophaga_granulosa             |
|                                     | Neisseria_elongata                   |
|                                     | Cardiobacterium_valvarum             |

**Supplementary Table 5. List of hub species.**

| Subgingival Microbiome                 | Supragingival Microbiome      |
|----------------------------------------|-------------------------------|
| Sub-heal                               | Sup-heal                      |
| Streptococcus_sanguinis                | Aggregatibacter_segnis        |
| Porphyromonas_endodontalis             | Treponema_socranskii          |
| Alloprevotella_tanneriae               | Treponema_maltophilum         |
| Prevotella_denticola                   | Treponema_vincentii           |
| Actinomyces_massiliensis               | Prevotella_sp_oral_taxon_473  |
| Prevotella_oris                        | Sup-dis                       |
| Capnocytophaga_sputigena               | Capnocytophaga_sputigena      |
| Treponema_denticola                    | Tannerella_forsythia          |
| Filifactor_alocis                      | Treponema_denticola           |
| Eubacterium_nodatum                    | Porphyromonas_endodontalis    |
| Desulfobulbus_oralis                   | Selenomonas_sputigena         |
| Anaeroglobus_geminatus                 | Actinomyces_sp_oral_taxon_897 |
| Treponema_socranskii                   | Anaeroglobus_geminatus        |
| Atopobium_rimae                        | Prevotella_maculosa           |
| Parvimonas_micra                       | Selenomonas_sp_oral_taxon_892 |
| Treponema_vincentii                    | Bulleidia_extructa            |
| Leptotrichia_hofstadii                 | Selenomonas_sp_oral_taxon_920 |
| Treponema_maltophilum                  |                               |
| Prevotella_baroniae                    |                               |
| Selenomonas_sputigena                  |                               |
| Prevotella_buccae                      |                               |
| Campylobacter_rectus                   |                               |
| Olsenella_uli                          |                               |
| Bifidobacterium_dentium                |                               |
| Bacteroidetes_bacterium_oral_taxon_272 |                               |
| Bulleidia_extructa                     |                               |
| Dialister_pneumosintes                 |                               |
| Prevotella_veroralis                   |                               |
| Treponema_sp_OMZ_838                   |                               |
| Treponema_lecithinolyticum             |                               |
| Prevotella_salivae                     |                               |
| Sub-dis                                |                               |
| Capnocytophaga_granulosa               |                               |
| Selenomonas_noxia                      |                               |



## Supplementary Figures

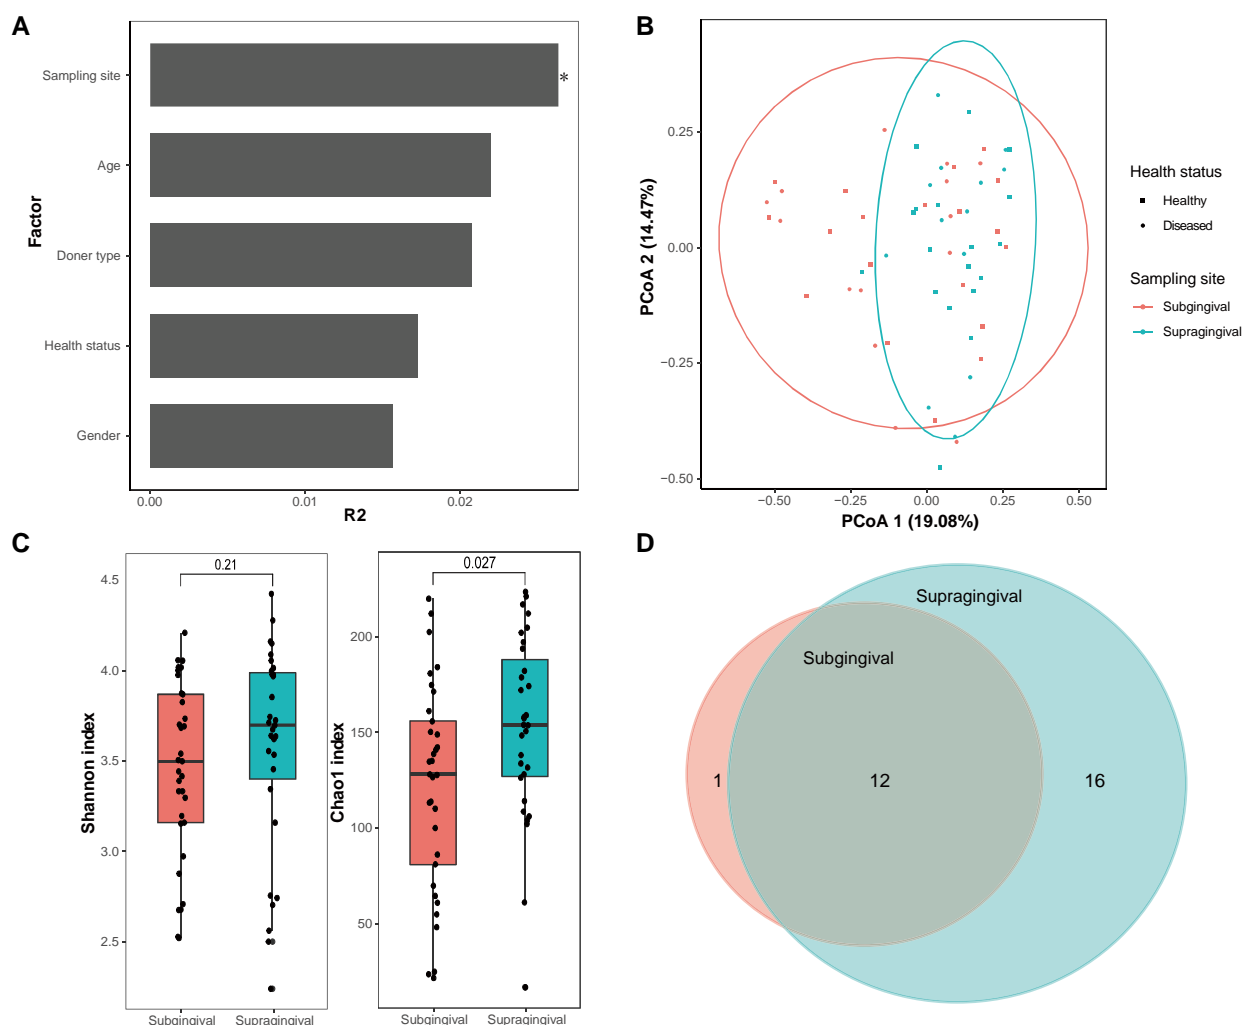

**Supplementary Figure 1. Comparison between supragingival and subgingival microbiome. (A)** PERMANOVA showed that different sampling sites had distinct microbial communities. **(B)** Principal coordinate analysis showed a difference between supragingival and subgingival communities in terms of beta diversity. The green and red ellipses indicated the 95% confidence regions of the supragingival and subgingival microbiome, respectively. **(C)** Alpha diversity was analyzed using Shannon and Chao1 indices. No significant difference was observed in Shannon index. Chao1 index of supragingival samples was significantly higher than that of subgingival samples. This meant that the supragingival microbiome had higher species richness but poorer evenness. **(D)** Venn diagram showed there were 28 and 13 core species in supragingival and subgingival microbiome, respectively, notably 12 species were shared by both cores.

**A**

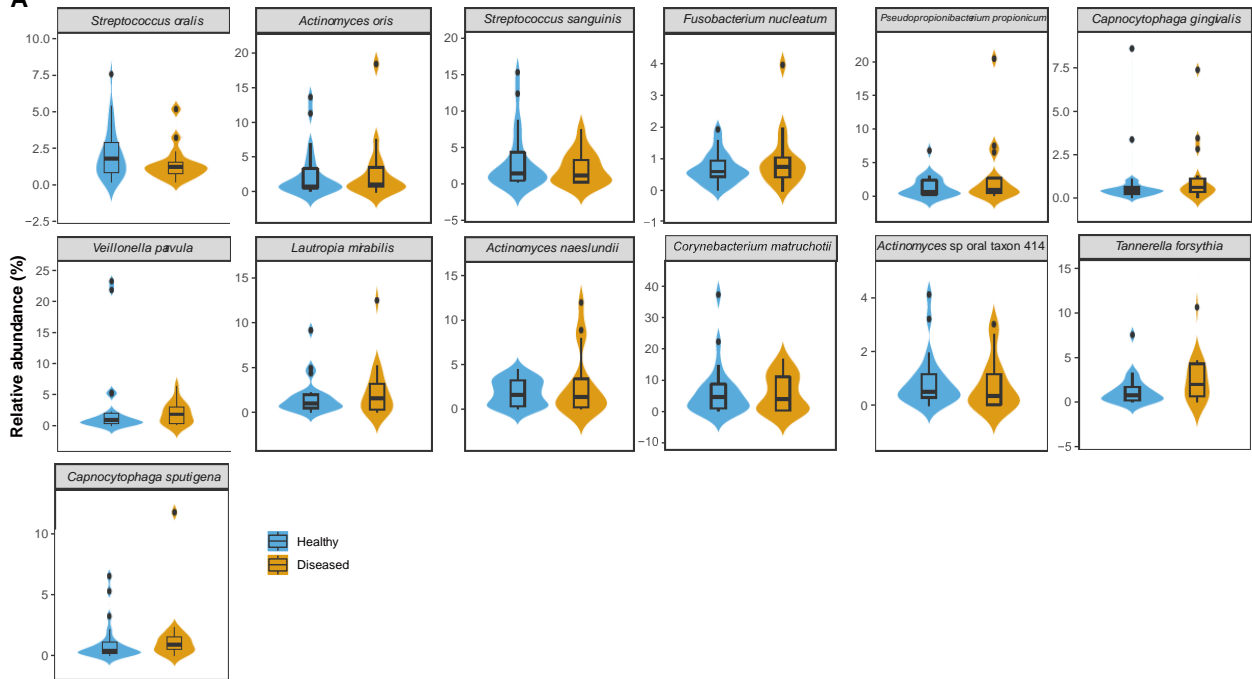

**B**

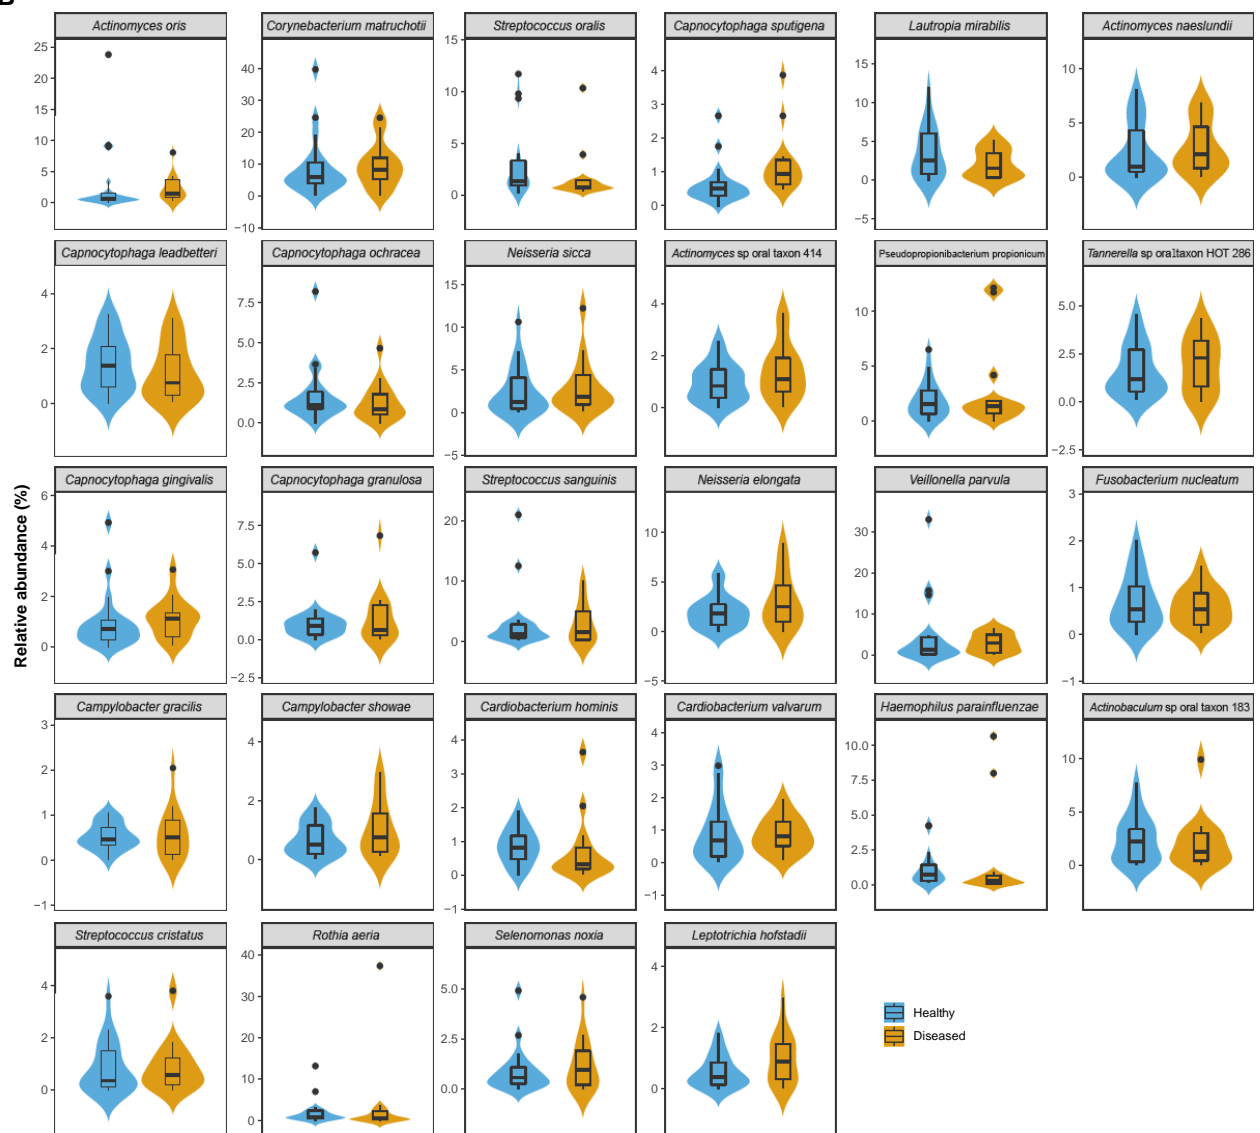

**Supplementary Figure 2. Comparison of relative abundance of the core species between healthy and diseased microbiome. (A) 13 subgingival core species (B) 28 supragingival core species.** Blue violins and boxes represented healthy microbiome while yellow violins and boxes represented diseased microbiome. No significant differences were detected in the relative abundance of these core species. This indicates the core components of the supra- and subgingival microbiome did not change with the shift of health conditions.

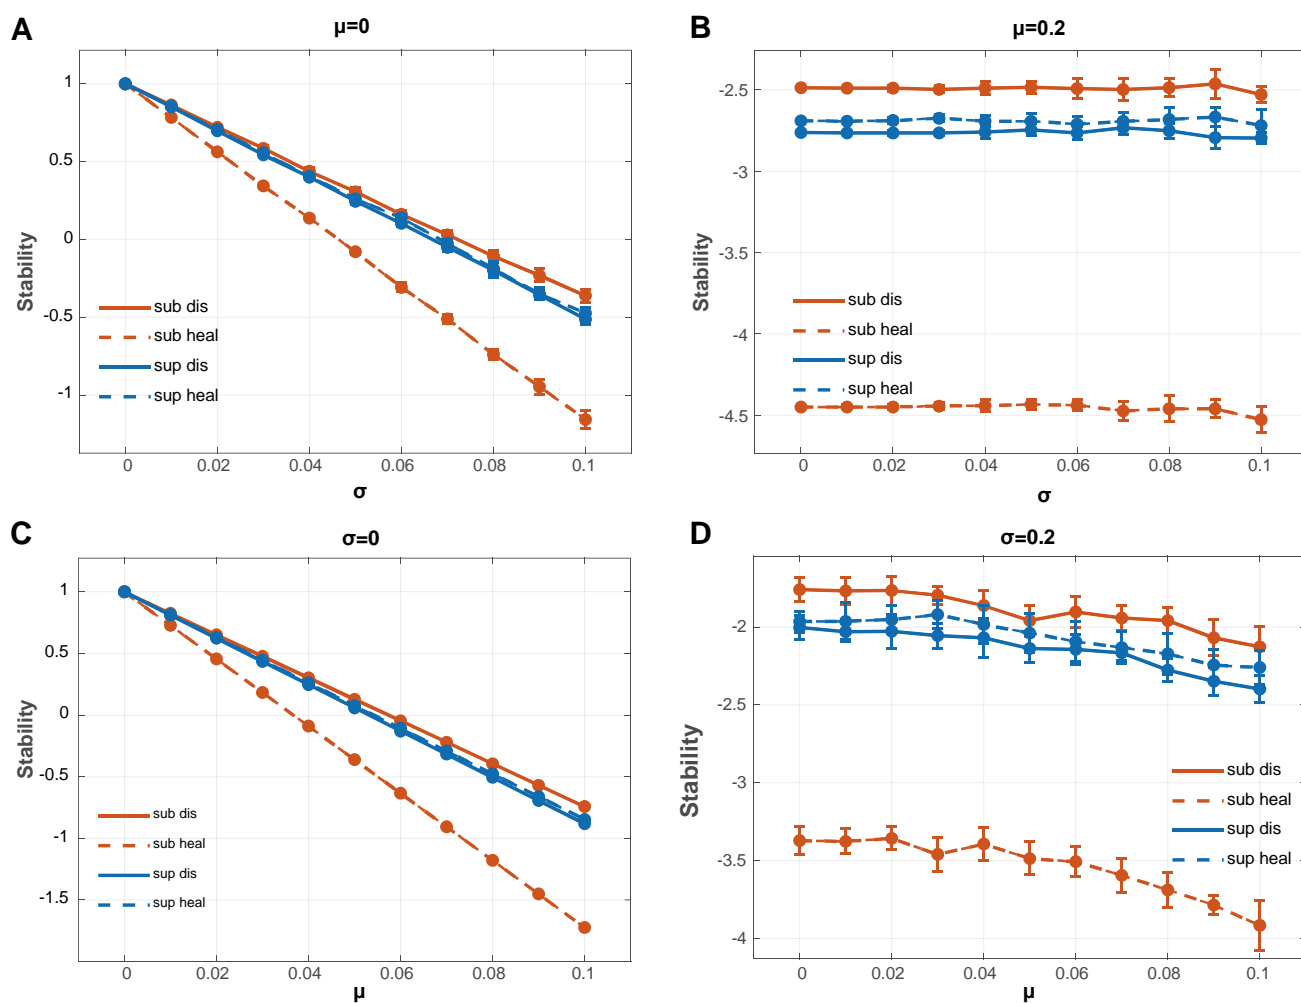

**Supplementary Figure 3. Other parameter sets of calculating local stability.** Other parameter sets we used to compare stability among communities were shown. All these simulations showed the same result as in Figure 5, which proved the robustness of our findings.
